# Supplementary material for: Structural Characterisation of Predicted Helical Regions in the Chironex fleckeri CfTX-1 Toxin
Source: Mar Drugs. 2018 Jun 7;16(6):201. doi: 10.3390/md16060201 (PMC6024933; doi:10.3390/md16060201)
Supplement: Supplementary file 1 [file marinedrugs-16-00201-s001.pdf]

**Supplementary Table S1: Top 10 threading templates used by I-TASSER**

| Rank | PDB Hit               | Iden1 | Iden2 | Coverage | Norm. Z-score |
|------|-----------------------|-------|-------|----------|---------------|
| 1    | <a href="#">3eb7A</a> | 0.15  | 0.17  | 0.73     | 1.25          |
| 2    | <a href="#">3zkvA</a> | 0.11  | 0.18  | 0.68     | 1.35          |
| 3    | <a href="#">5ic0A</a> | 0.07  | 0.17  | 0.90     | 1.74          |
| 4    | <a href="#">4c0oA</a> | 0.13  | 0.16  | 0.66     | 1.35          |
| 5    | <a href="#">3eb7A</a> | 0.12  | 0.17  | 0.77     | 1.27          |
| 6    | <a href="#">5j65A</a> | 0.11  | 0.17  | 0.72     | 1.73          |
| 7    | <a href="#">1dlcA</a> | 0.11  | 0.18  | 0.75     | 1.17          |
| 8    | <a href="#">3ay5A</a> | 0.09  | 0.14  | 0.54     | 1.29          |
| 9    | <a href="#">2qkgA</a> | 0.12  | 0.17  | 0.77     | 1.27          |
| 10   | <a href="#">5jliA</a> | 0.08  | 0.13  | 0.64     | 1.23          |

- a) Ident1 is the percentage sequence identity of the templates in the threading aligned region with the query sequence.
- b) Ident2 is the percentage sequence identity of the whole template chains with query sequence.
- c) Cov represents the coverage of the threading alignment and is equal to the number of aligned residues divided by the length of query protein.
- d) Norm. Z-score is the normalized Z-score of the threading alignments. Alignment with a Normalized Z-score >1 mean a good alignment and vice versa.

**Supplementary Table S2: Top 10 identified structural analogues in PDB**

| Rank | PDB Hit               | TM-score | RMSD <sup>a</sup> | Iden <sup>a</sup> | Coverage |
|------|-----------------------|----------|-------------------|-------------------|----------|
| 1    | <a href="#">5ic0A</a> | 0.877    | 1.4               | 0.061             | 0.895    |
| 2    | <a href="#">2x0cA</a> | 0.389    | 4.12              | 0.050             | 0.450    |
| 3    | <a href="#">4fhmB</a> | 0.375    | 7.02              | 0.034             | 0.605    |
| 4    | <a href="#">1i3qB</a> | 0.372    | 7.32              | 0.040             | 0.612    |
| 5    | <a href="#">3wajA</a> | 0.370    | 7.81              | 0.044             | 0.656    |
| 6    | <a href="#">5a9q1</a> | 0.369    | 6.79              | 0.066             | 0.572    |
| 7    | <a href="#">5flmB</a> | 0.368    | 7.18              | 0.061             | 0.594    |
| 8    | <a href="#">3f7fD</a> | 0.365    | 6.83              | 0.043             | 0.581    |
| 9    | <a href="#">4qiwB</a> | 0.361    | 7.21              | 0.051             | 0.579    |
| 10   | <a href="#">5anbK</a> | 0.360    | 7.57              | 0.039             | 0.621    |

- a) Ranking of proteins is based on TM-score of the structural alignment between the query structure and known structures in the PDB library. TM-score is a metric for determining the similarity of two protein structure models based on their given residue equivalency.
- b) RMSD<sup>a</sup> is the root-mean-square deviation (RMSD) between residues that are structurally aligned by TM-align.
- c) Iden<sup>a</sup> is the percentage sequence identity in the structurally aligned region.
- d) Coverage represents the coverage of the alignment by TM-align and is equal to the number of structurally aligned residues divided by length of the query protein.
